# Supplementary material for: Promoted dehydrogenation in ammine lithium borohydride supported by carbon nanotubes
Source: Royal Society of Chemistry journal article supplement (doi:10.1039/c1dt10552c), 2011-01-01
Supplement: c1dt10552c.pdf [file c1dt10552c.pdf]

## Supporting information

Promoted dehydrogenation in ammine lithium borohydride

supported by carbon nanotubes

Xinyi Chen, Shaofeng Li, Yanhui Guo, and Xuebin Yu\*

Department of Materials Science, Fudan University, Shanghai 200433, China

E-mail: [yuxuebin@fudan.edu.cn](mailto:yuxuebin@fudan.edu.cn)

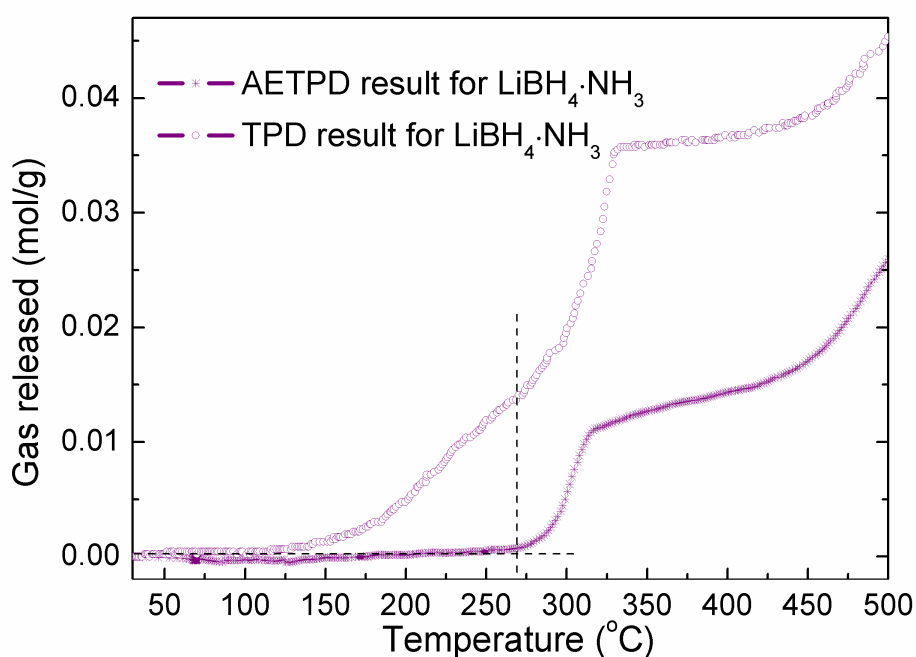

Figure S1 Ammonia eliminating temperature-programmed desorption (AETPD) and TPD results of gas evolution for LiBH<sub>4</sub>·NH<sub>3</sub> with a heating rate of 5 °C/min. It shows that NH<sub>3</sub> emissions can be totally eliminated before 270 °C. Therefore, 270 °C was the upper limit of temperature in the AETPD experiments (Figure 5).
